# Supplementary material
Source: MDPI journal article supplement (https://www.mdpi.com/1996-1073/16/4/1914)
Supplement: s1 [file s1]

## Supplementary Materials

**Table S1.** Fixed capital estimate summary (2020 prices in US\$).

| Fixed capital cost estimation                       |                         | Cost (\$)  |            |            |            |
|-----------------------------------------------------|-------------------------|------------|------------|------------|------------|
|                                                     |                         | Scenario 1 | Scenario 2 | Scenario 3 | Scenario 4 |
| <b>A. Total Plant Direct Cost (TPDC)</b>            |                         |            |            |            |            |
| 1.                                                  | Equipment Purchase Cost | 2,169,000  | 1,706,000  | 3,314,000  | 3,614,000  |
| 2.                                                  | Installation            | 1,617,000  | 792,000    | 1,763,000  | 1,866,000  |
| 3.                                                  | Process Piping          | 759,000    | 597,000    | 1,160,000  | 1,265,000  |
| 4.                                                  | Instrumentation         | 868,000    | 683,000    | 1,326,000  | 1,446,000  |
| 5.                                                  | Insulation              | 65,000     | 51,000     | 99,000     | 108,000    |
| 6.                                                  | Electrical              | 217,000    | 171,000    | 331,000    | 361,000    |
| 7.                                                  | Buildings               | 976,000    | 768,000    | 1,491,000  | 1,626,000  |
| 8.                                                  | Yard Improvement        | 325,000    | 256,000    | 497,000    | 542,000    |
| 9.                                                  | Auxiliary Facilities    | 434,000    | 341,000    | 663,000    | 723,000    |
| TPDC                                                |                         | 7,429,000  | 5,365,000  | 10,646,000 | 11,551,000 |
| <b>B. Total Plant Indirect Cost (TPIC)</b>          |                         |            |            |            |            |
| 10.                                                 | Engineering             | 1,857,000  | 1,341,000  | 2,661,000  | 2,888,000  |
| 11.                                                 | Construction            | 2,600,000  | 1,878,000  | 3,726,000  | 4,043,000  |
| TPIC                                                |                         | 4,457,000  | 3,219,000  | 6,388,000  | 6,931,000  |
| <b>C. Total Plant Cost (TPC = TPDC+TPIC)</b>        |                         |            |            |            |            |
| TPC                                                 |                         | 11,886,000 | 8,584,000  | 17,033,000 | 18,482,000 |
| <b>D. Contractor's Fee &amp; Contingency (CFC)</b>  |                         |            |            |            |            |
| 12.                                                 | Contractor's Fee        | 594,000    | 429,000    | 852,000    | 924,000    |
| 13.                                                 | Contingency             | 1,189,000  | 858,000    | 1,703,000  | 1,848,000  |
| CFC = 12+13                                         |                         | 1,783,000  | 1,288,000  | 2,555,000  | 2,772,000  |
| <b>E. Direct Fixed Capital Cost (DFC = TPC+CFC)</b> |                         |            |            |            |            |
| DFC                                                 |                         | 13,669,000 | 9,871,000  | 19,588,000 | 21,254,000 |
| <b>F. Working Capital</b>                           |                         | 141,000    | 113,000    | 277,000    | 259,000    |
| <b>G. Startup Cost</b>                              |                         | 683,000    | 494,000    | 979,000    | 1,063,000  |
| Total Investment (E+F+G)                            |                         | 14,493,000 | 10,478,000 | 20,845,000 | 22,576,000 |

Note: Scenario 1: Direct CHP generation from wood sawdust and shavings; Scenario 2: Wood pellet production without CHP; Scenario 3: Production of pellets and CHP from steam-exploded wood; Scenario 4: Production of pellets and CHP from torrefied wood.

**Table S2.** Profitability analysis (2020 prices (US\$) for direct CHP generation from wood sawdust and shavings (scenario 1).

| Estimation of economic indices | Cost /Revenue item                   | Values                         |
|--------------------------------|--------------------------------------|--------------------------------|
| A.                             | Direct Fixed Capital                 | \$13,669,000                   |
| B.                             | Working Capital                      | \$141,000                      |
| C.                             | Startup Cost                         | \$683,000                      |
| D.                             | Up-Front R&D <sup>1</sup>            | \$0                            |
| E.                             | Up-Front Royalties                   | \$0                            |
| F.                             | Total Investment (A+B+C+D+E)         | \$14,493,000                   |
| G.                             | Investment Charged to This Project   | \$14,493,000                   |
| H.                             | <b>Revenue/Credit/Savings Rates</b>  |                                |
|                                | LP-Steam (Main Revenue)              | 146,741 tonne /year            |
|                                | HP-Steam (Revenue)                   | 46,957 tonne /year             |
|                                | Std Power (Revenue)                  | 3,384,611 kW-h/year            |
|                                | Std Power (Savings)                  | 4,896,453 kW-h/year            |
| I.                             | <b>Revenue/Credit/Savings Price</b>  |                                |
|                                | LP-Steam (Main Revenue)              | \$12.00 /tonne                 |
|                                | HP-Steam (Revenue)                   | \$20.00 /tonne                 |
|                                | Std Power (Revenue)                  | \$0.10 /kW-h                   |
|                                | Std Power (Savings)                  | \$0.10 /kW-h                   |
| J.                             | <b>Revenues/Credits/Savings</b>      |                                |
|                                | LP-Steam (Main Revenue)              | \$1,760,890 /year              |
|                                | HP-Steam (Revenue)                   | \$939,142 /year                |
|                                | Std Power (Revenue)                  | \$338,461 /year                |
|                                | Std Power (Savings)                  | \$489,645 /year                |
|                                | 1 Total Revenues                     | \$3,038,493 /year              |
|                                | 2 Total Savings                      | \$489,645 /year                |
| K.                             | <b>Annual Operating Cost (AOC)</b>   |                                |
|                                | 1 Actual AOC                         | \$4,242,000 /year              |
|                                | 2 Net AOC (K1-J2)                    | \$3,752,408 /year              |
| L.                             | <b>Unit Production Cost /Revenue</b> |                                |
|                                | Unit Production Cost                 | \$28.91 /tonne MP <sup>2</sup> |
|                                | Net Unit Production Cost             | \$25.57 /tonne MP              |
|                                | Unit Production Revenue              | \$20.71 /tonne MP              |
| M.                             | Gross Profit (J1-K2)                 | \$-714,000 /year               |
| N.                             | Taxes (40%)                          | \$0 /year                      |
| O.                             | Net Profit (M-N + Depreciation)      | \$585,000 /year                |
| Gross Margin                   | -23.50 %                             |                                |
| Return On Investment           | 4.03 %                               |                                |
| Payback Time                   | 24.79 years                          |                                |

<sup>1</sup> Research and development, <sup>2</sup> Main product

**Table S3.** Cash flow analysis (US\$000) for direct CHP generation from wood sawdust and shavings (scenario 1).

| Year | Capital investment | Sales revenues | Operating cost | Gross profit | Depreciation | Taxable income | Taxes | Net profit | Net cash flow |
|------|--------------------|----------------|----------------|--------------|--------------|----------------|-------|------------|---------------|
| 1    | -4,101             | 0              | 0              | 0            | 0            | 0              | 0     | 0          | -4,101        |
| 2    | -5,608             | 1,823          | 3,919          | -2,096       | 1,299        | 0              | 0     | -797       | -6,405        |
| 3    | -4,101             | 2,735          | 4,161          | -1,427       | 1,299        | 0              | 0     | -128       | -4,229        |
| 4    | 0                  | 3,038          | 4,242          | -1,204       | 1,299        | 0              | 0     | 95         | 95            |
| 5    | 0                  | 3,038          | 4,242          | -1,204       | 1,299        | 0              | 0     | 95         | 95            |
| 6    | 0                  | 3,038          | 4,242          | -1,204       | 1,299        | 0              | 0     | 95         | 95            |
| 7    | 0                  | 3,038          | 4,242          | -1,204       | 1,299        | 0              | 0     | 95         | 95            |
| 8    | 0                  | 3,038          | 4,242          | -1,204       | 1,299        | 0              | 0     | 95         | 95            |
| 9    | 0                  | 3,038          | 4,242          | -1,204       | 1,299        | 0              | 0     | 95         | 95            |
| 10   | 0                  | 3,038          | 4,242          | -1,204       | 1,299        | 0              | 0     | 95         | 95            |
| 11   | 0                  | 3,038          | 4,242          | -1,204       | 1,299        | 0              | 0     | 95         | 95            |
| 12   | 0                  | 3,038          | 2,943          | 95           | 0            | 95             | 38    | 57         | 57            |
| 13   | 0                  | 3,038          | 2,943          | 95           | 0            | 95             | 38    | 57         | 57            |
| 14   | 0                  | 3,038          | 2,943          | 95           | 0            | 95             | 38    | 57         | 57            |
| 15   | 0                  | 3,038          | 2,943          | 95           | 0            | 95             | 38    | 57         | 57            |
| 16   | 0                  | 3,038          | 2,943          | 95           | 0            | 95             | 38    | 57         | 57            |
| 17   | 0                  | 3,038          | 2,943          | 95           | 0            | 95             | 38    | 57         | 57            |
| 18   | 0                  | 3,038          | 2,943          | 95           | 0            | 95             | 38    | 57         | 57            |
| 19   | 0                  | 3,038          | 2,943          | 95           | 0            | 95             | 38    | 57         | 57            |
| 20   | 824                | 3,038          | 2,943          | 95           | 0            | 95             | 38    | 57         | 881           |

**Table S4.** Profitability analysis (2020 prices in US\$) for wood pellet production without CHP (scenario 2).

| Estimation of economic indices | Cost /Revenue item                   | Values                         |
|--------------------------------|--------------------------------------|--------------------------------|
| A.                             | Direct Fixed Capital                 | \$9,871,000                    |
| B.                             | Working Capital                      | \$113,000                      |
| C.                             | Startup Cost                         | \$494,000                      |
| D.                             | Up-Front R&D <sup>1</sup>            | \$0                            |
| E.                             | Up-Front Royalties                   | \$0                            |
| F.                             | Total Investment (A+B+C+D+E)         | \$10,478,000                   |
| G.                             | Investment Charged to This Project   | \$10,478,000                   |
| H.                             | <b>Revenue/Credit/Savings Rates</b>  |                                |
|                                | Wood Pellets (Main Revenue)          | 72,000 tonne /year             |
| I.                             | <b>Revenue/Credit/Savings Price</b>  |                                |
|                                | Wood Pellets (Main Revenue)          | \$120 /tonne                   |
| J.                             | <b>Revenues/Credits/Savings</b>      |                                |
|                                | Wood Pellets (Main Revenue)          | \$8,640,000 /year              |
| K.                             | <b>Annual Operating Cost (AOC)</b>   |                                |
|                                | AOC                                  | \$3,192,000 /year              |
| L.                             | <b>Unit Production Cost /Revenue</b> |                                |
|                                | Unit Production Cost                 | \$44.33 /tonne MP <sup>2</sup> |
|                                | Unit Production Revenue              | \$120 /tonne MP                |
| M.                             | Gross Profit (J-K)                   | \$5,448,000 /year              |
| N.                             | Taxes (40%)                          | \$2,179,000 /year              |
| O.                             | Net Profit (M-N + Depreciation)      | \$4,207,000 /year              |
|                                |                                      |                                |
| Gross Margin                   | 63.06 %                              |                                |
| Return On Investment           | 40.15 %                              |                                |
| Payback Time                   | 2.49 years                           |                                |

<sup>1</sup>Research and development, <sup>2</sup> Main product

**Table S5.** Cash flow analysis (US\$000) for wood pellet production without CHP (scenario 2).

| Year | Capital investment | Sales revenues | Operating cost | Gross profit | Depreciation | Taxable income | Taxes | Net profit | Net cash flow |
|------|--------------------|----------------|----------------|--------------|--------------|----------------|-------|------------|---------------|
| 1    | - 2,961            | 0              | 0              | 0            | 0            | 0              | 0     | 0          | -2,961        |
| 2    | - 4,062            | 5,184          | 2,875          | 2,309        | 938          | 2,309          | 924   | 2,323      | -1,739        |
| 3    | - 2,961            | 7,776          | 3,112          | 4,664        | 938          | 4,664          | 1,865 | 3,736      | 774           |
| 4    | 0                  | 8,640          | 3,192          | 5,448        | 938          | 5,448          | 2,179 | 4,207      | 4,207         |
| 5    | 0                  | 8,640          | 3,192          | 5,448        | 938          | 5,448          | 2,179 | 4,207      | 4,207         |
| 6    | 0                  | 8,640          | 3,192          | 5,448        | 938          | 5,448          | 2,179 | 4,207      | 4,207         |
| 7    | 0                  | 8,640          | 3,192          | 5,448        | 938          | 5,448          | 2,179 | 4,207      | 4,207         |
| 8    | 0                  | 8,640          | 3,192          | 5,448        | 938          | 5,448          | 2,179 | 4,207      | 4,207         |
| 9    | 0                  | 8,640          | 3,192          | 5,448        | 938          | 5,448          | 2,179 | 4,207      | 4,207         |
| 10   | 0                  | 8,640          | 3,192          | 5,448        | 938          | 5,448          | 2,179 | 4,207      | 4,207         |
| 11   | 0                  | 8,640          | 3,192          | 5,448        | 938          | 5,448          | 2,179 | 4,207      | 4,207         |
| 12   | 0                  | 8,640          | 2,254          | 6,386        | 0            | 6,386          | 2,554 | 3,832      | 3,832         |
| 13   | 0                  | 8,640          | 2,254          | 6,386        | 0            | 6,386          | 2,554 | 3,832      | 3,832         |
| 14   | 0                  | 8,640          | 2,254          | 6,386        | 0            | 6,386          | 2,554 | 3,832      | 3,832         |
| 15   | 0                  | 8,640          | 2,254          | 6,386        | 0            | 6,386          | 2,554 | 3,832      | 3,832         |
| 16   | 0                  | 8,640          | 2,254          | 6,386        | 0            | 6,386          | 2,554 | 3,832      | 3,832         |
| 17   | 0                  | 8,640          | 2,254          | 6,386        | 0            | 6,386          | 2,554 | 3,832      | 3,832         |
| 18   | 0                  | 8,640          | 2,254          | 6,386        | 0            | 6,386          | 2,554 | 3,832      | 3,832         |
| 19   | 0                  | 8,640          | 2,254          | 6,386        | 0            | 6,386          | 2,554 | 3,832      | 3,832         |
| 20   | 607                | 8,640          | 2,254          | 6,386        | 0            | 6,386          | 2,554 | 3,832      | 4,439         |

**Table S6.** Profitability analysis (2020 prices in US\$) for production of pellets and CHP from steam-exploded wood (scenario 3).

| Estimation of economic indices | Cost /Revenue item                   | Values                          |
|--------------------------------|--------------------------------------|---------------------------------|
| A.                             | Direct Fixed Capital                 | \$19,588,000                    |
| B.                             | Working Capital                      | \$277,000                       |
| C.                             | Startup Cost                         | \$979,000                       |
| D.                             | Up-Front R&D <sup>1</sup>            | \$0                             |
| E.                             | Up-Front Royalties                   | \$0                             |
| F.                             | Total Investment (A+B+C+D+E)         | \$20,845,000                    |
| G.                             | Investment Charged to This Project   | \$20,845,000                    |
| H.                             | <b>Revenue/Credit/Savings Rates</b>  |                                 |
|                                | Steam-treated Pellets (Main Revenue) | 53,543 tonne /year              |
|                                | LP-Steam (Revenue)                   | 53,075 tonne /year              |
|                                | HMF (Revenue)                        | 200 tonne /year                 |
|                                | Furfural (Revenue)                   | 782 tonne /year                 |
|                                | Std Power(Savings)                   | 2,431,553 kW-h/year             |
| I.                             | <b>Revenue/Credit/Savings Price</b>  |                                 |
|                                | Steam-treated Pellets (Main Revenue) | \$144 /tonne                    |
|                                | LP-Steam (Revenue)                   | \$12 /tonne                     |
|                                | HMF (Revenue)                        | \$1000 /tonne                   |
|                                | Furfural (Revenue)                   | \$800 /tonne                    |
|                                | Std Power(Savings)                   | \$0.10 /kW-h                    |
| J.                             | <b>Revenues/Credits/Savings</b>      |                                 |
|                                | Steam-treated Pellets (Main Revenue) | \$7,710,124 /year               |
|                                | LP-Steam (Revenue)                   | \$636,894 /year                 |
|                                | HMF (Revenue)                        | \$199,974 /year                 |
|                                | Furfural (Revenue)                   | \$625,948 /year                 |
|                                | Std Power(Savings)                   | \$243,155                       |
|                                | 1 Total Revenues                     | \$9,172,941 /year               |
|                                | 2 Total Savings                      | \$243,155 /year                 |
| K.                             | <b>Annual Operating Cost (AOC)</b>   |                                 |
|                                | 1 Actual AOC                         | \$7,047,000 /year               |
|                                | 2 Net AOC (K1-J2)                    | \$6,803,000 /year               |
| L.                             | <b>Unit Production Cost /Revenue</b> |                                 |
|                                | Unit Production Cost                 | \$131.61 /tonne MP <sup>2</sup> |
|                                | Net Unit Production Cost             | \$127.06 /tonne MP              |
|                                | Unit Production Revenue              | \$171.32 /tonne MP              |
| M.                             | Gross Profit (J1-K2)                 | \$2,370,000 /year               |
| N.                             | Taxes (40%)                          | \$948,000 /year                 |
| O.                             | Net Profit (M-N + Depreciation)      | \$3,283,000 /year               |
|                                | Gross Margin                         | 25.83%                          |
|                                | Return On Investment                 | 15.75 %                         |
|                                | Payback Time                         | 6.35 years                      |

<sup>1</sup>Research and development, <sup>2</sup> Main product

**Table S7.** Cash flow analysis (US\$000) for production of pellets and CHP from steam-exploded wood (scenario 3).

| Year | Capital investment | Sales revenues | Operating cost | Gross profit | Depreciation | Taxable income | Taxes | Net profit | Net cash flow |
|------|--------------------|----------------|----------------|--------------|--------------|----------------|-------|------------|---------------|
| 1    | - 5,877            | 0              | 0              | 0            | 0            | 0              | 0     | 0          | -5,877        |
| 2    | - 8,112            | 5,504          | 6,532          | - 1,029      | 1,861        | 0              | 0     | 832        | -7,280        |
| 3    | - 5,877            | 8,256          | 6,918          | 1,338        | 1,861        | 1,338          | 535   | 2,664      | -3,213        |
| 4    | 0                  | 9,173          | 7,047          | 2,126        | 1,861        | 2,126          | 851   | 3,137      | 3,137         |
| 5    | 0                  | 9,173          | 7,047          | 2,126        | 1,861        | 2,126          | 851   | 3,137      | 3,137         |
| 6    | 0                  | 9,173          | 7,047          | 2,126        | 1,861        | 2,126          | 851   | 3,137      | 3,137         |
| 7    | 0                  | 9,173          | 7,047          | 2,126        | 1,861        | 2,126          | 851   | 3,137      | 3,137         |
| 8    | 0                  | 9,173          | 7,047          | 2,126        | 1,861        | 2,126          | 851   | 3,137      | 3,137         |
| 9    | 0                  | 9,173          | 7,047          | 2,126        | 1,861        | 2,126          | 851   | 3,137      | 3,137         |
| 10   | 0                  | 9,173          | 7,047          | 2,126        | 1,861        | 2,126          | 851   | 3,137      | 3,137         |
| 11   | 0                  | 9,173          | 7,047          | 2,126        | 1,861        | 2,126          | 851   | 3,137      | 3,137         |
| 12   | 0                  | 9,173          | 5,186          | 3,987        | 0            | 3,987          | 1,595 | 2,392      | 2,392         |
| 13   | 0                  | 9,173          | 5,186          | 3,987        | 0            | 3,987          | 1,595 | 2,392      | 2,392         |
| 14   | 0                  | 9,173          | 5,186          | 3,987        | 0            | 3,987          | 1,595 | 2,392      | 2,392         |
| 15   | 0                  | 9,173          | 5,186          | 3,987        | 0            | 3,987          | 1,595 | 2,392      | 2,392         |
| 16   | 0                  | 9,173          | 5,186          | 3,987        | 0            | 3,987          | 1,595 | 2,392      | 2,392         |
| 17   | 0                  | 9,173          | 5,186          | 3,987        | 0            | 3,987          | 1,595 | 2,392      | 2,392         |
| 18   | 0                  | 9,173          | 5,186          | 3,987        | 0            | 3,987          | 1,595 | 2,392      | 2,392         |
| 19   | 0                  | 9,173          | 5,186          | 3,987        | 0            | 3,987          | 1,595 | 2,392      | 2,392         |
| 20   | 1,256              | 9,173          | 5,186          | 3,987        | 0            | 3,987          | 1,595 | 2,392      | 3,648         |

**Table S8.** Profitability analysis (2020 prices in US\$) for production of pellets and CHP from torrefied wood (scenario 4).

| Estimation of economic indices |   | Cost /Revenue item                   | Values                          |
|--------------------------------|---|--------------------------------------|---------------------------------|
| A.                             |   | Direct Fixed Capital                 | \$21,254,000                    |
| B.                             |   | Working Capital                      | \$259,000                       |
| C.                             |   | Startup Cost                         | \$1,063,000                     |
| D.                             |   | Total Investment (A+B+C+D+E)         | \$22,576,000                    |
| E.                             |   | Investment Charged to This Project   | \$22,576,000                    |
| F.                             |   | <b>Revenue/Credit/Savings Rates</b>  |                                 |
|                                |   | Torrefied Pellets (Main Revenue)     | 46,837 tonne /year              |
|                                |   | HP-Steam (Revenue)                   | 14,876 tonne /year              |
|                                |   | LP-Steam (Revenue)                   | 546,488 tonne /year             |
|                                |   | Acetic acid (Revenue)                | 2,589 tonne /year               |
|                                |   | Furfural (Revenue)                   | 4,568 tonne /year               |
|                                |   | Std Power(Savings)                   | 2,062,124 kW-h/year             |
| G.                             |   | <b>Revenue/Credit/Savings Price</b>  |                                 |
|                                |   | Torrefied Pellets (Main Revenue)     | \$140 /tonne                    |
|                                |   | HP-Steam (Revenue)                   | \$20 /tonne                     |
|                                |   | LP-Steam (Revenue)                   | \$12 /tonne                     |
|                                |   | Acetic acid (Revenue)                | \$1200 /tonne                   |
|                                |   | Furfural (Revenue)                   | \$800 /tonne                    |
|                                |   | Std Power(Savings)                   | \$0.10 /kW-h                    |
| H.                             |   | <b>Revenues/Credits/Savings</b>      |                                 |
|                                |   | Torrefied Pellets (Main Revenue)     | \$6,557,175 /year               |
|                                |   | HP-Steam (Revenue)                   | \$297,552 /year                 |
|                                |   | LP-Steam (Revenue)                   | \$557,854 /year                 |
|                                |   | Acetic acid (Revenue)                | \$3,106,497 /year               |
|                                |   | Furfural (Revenue)                   | \$3,654,703 /year               |
|                                |   | Std Power(Savings)                   | \$206,212                       |
|                                | 1 | Total Revenues                       | \$14,173,752 /year              |
|                                | 2 | Total Savings                        | \$206,212 /year                 |
| I.                             |   | <b>Annual Operating Cost (AOC)</b>   |                                 |
|                                | 1 | Actual AOC                           | \$7,168,000 /year               |
|                                | 2 | Net AOC (I1-H2)                      | \$6,962,000 /year               |
| J.                             |   | <b>Unit Production Cost /Revenue</b> |                                 |
|                                |   | Unit Production Cost                 | \$153.04 /tonne MP <sup>1</sup> |
|                                |   | Net Unit Production Cost             | \$148.63 /tonne MP              |
|                                |   | Unit Production Revenue              | \$302.62 /tonne MP              |
| K.                             |   | Gross Profit (H1-I2)                 | \$7,212,000 /year               |
| L.                             |   | Taxes (40%)                          | \$2,885,000 /year               |
| M.                             |   | Net Profit (K-L + Depreciation)      | \$6,346,000 /year               |
|                                |   | Gross Margin                         | 50.88 %                         |
|                                |   | Return On Investment                 | 28.11 %                         |
|                                |   | Payback Time                         | 3.56 years                      |

<sup>1</sup> Research and development, <sup>2</sup> Main product



**Table S9.** Cash flow analysis (US\$000) for production of pellets and CHP from torrefied wood (scenario 4).

| Year | Capital investment | Sales revenues | Operating cost | Gross profit | Depreciation | Taxable income | Taxes | Net profit | Net cash flow |
|------|--------------------|----------------|----------------|--------------|--------------|----------------|-------|------------|---------------|
| 1    | -6,367             | 0              | 0              | 0            | 0            | 0              | 0     | 0          | -6,367        |
| 2    | -8,749             | 8,504          | 6,726          | 1,779        | 2,016        | 1,779          | 711   | 3,083      | -5,665        |
| 3    | -6,367             | 12,756         | 7,053          | 5,773        | 2,016        | 5,703          | 2,281 | 5,438      | -929          |
| 4    | 0                  | 14,174         | 7,162          | 7,012        | 2,016        | 7,012          | 2,805 | 6,223      | 6,223         |
| 5    | 0                  | 14,174         | 7,162          | 7,012        | 2,016        | 7,012          | 2,805 | 6,223      | 6,223         |
| 6    | 0                  | 14,174         | 7,162          | 7,012        | 2,016        | 7,012          | 2,805 | 6,223      | 6,223         |
| 7    | 0                  | 14,174         | 7,162          | 7,012        | 2,016        | 7,012          | 2,805 | 6,223      | 6,223         |
| 8    | 0                  | 14,174         | 7,162          | 7,012        | 2,016        | 7,012          | 2,805 | 6,223      | 6,223         |
| 9    | 0                  | 14,174         | 7,162          | 7,012        | 2,016        | 7,012          | 2,805 | 6,223      | 6,223         |
| 10   | 0                  | 14,174         | 7,162          | 7,012        | 2,016        | 7,012          | 2,805 | 6,223      | 6,223         |
| 11   | 0                  | 14,174         | 7,162          | 7,012        | 2,016        | 7,012          | 2,805 | 6,223      | 6,223         |
| 12   | 0                  | 14,174         | 5,146          | 9,028        | 0            | 9,028          | 3,611 | 5,417      | 5,417         |
| 13   | 0                  | 14,174         | 5,146          | 9,028        | 0            | 9,028          | 3,611 | 5,417      | 5,417         |
| 14   | 0                  | 14,174         | 5,146          | 9,028        | 0            | 9,028          | 3,611 | 5,417      | 5,417         |
| 15   | 0                  | 14,174         | 5,146          | 9,028        | 0            | 9,028          | 3,611 | 5,417      | 5,417         |
| 16   | 0                  | 14,174         | 5,146          | 9,028        | 0            | 9,028          | 3,611 | 5,417      | 5,417         |
| 17   | 0                  | 14,174         | 5,146          | 9,028        | 0            | 9,028          | 3,611 | 5,417      | 5,417         |
| 18   | 0                  | 14,174         | 5,146          | 9,028        | 0            | 9,028          | 3,611 | 5,417      | 5,417         |
| 19   | 0                  | 14,174         | 5,146          | 9,028        | 0            | 9,028          | 3,611 | 5,417      | 5,417         |
| 20   | 1,320              | 14,174         | 5,146          | 9,028        | 0            | 9,028          | 3,611 | 5,417      | 6,737         |

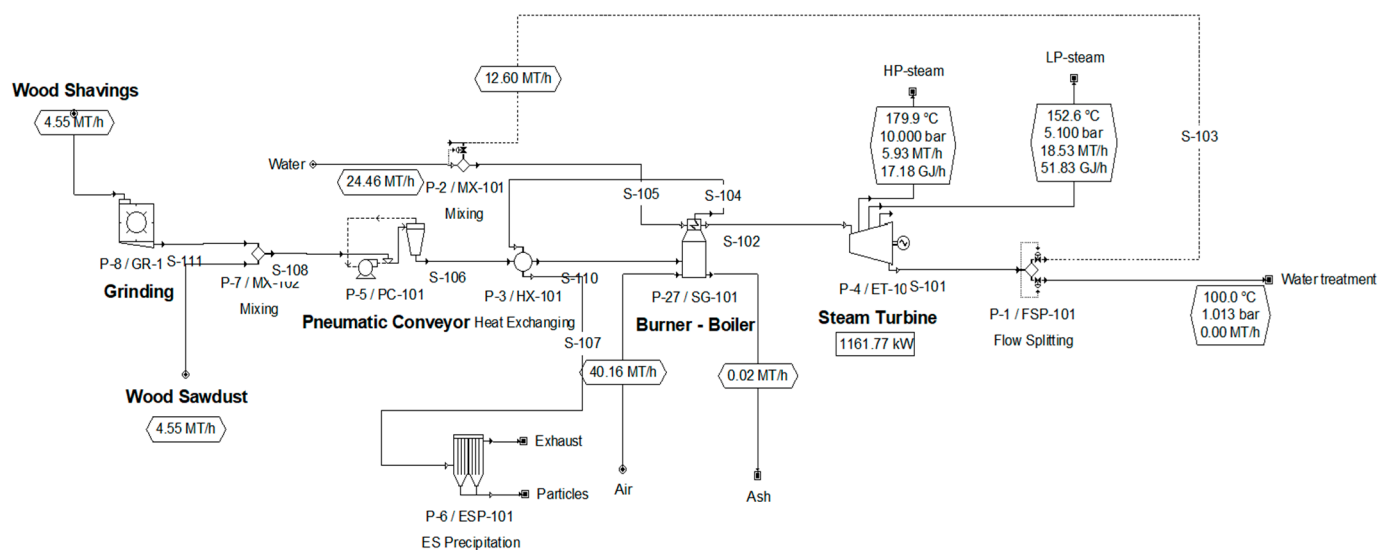

**Figure S1.** Process flow diagram for heat and electricity production from wood sawdust (scenario 1).

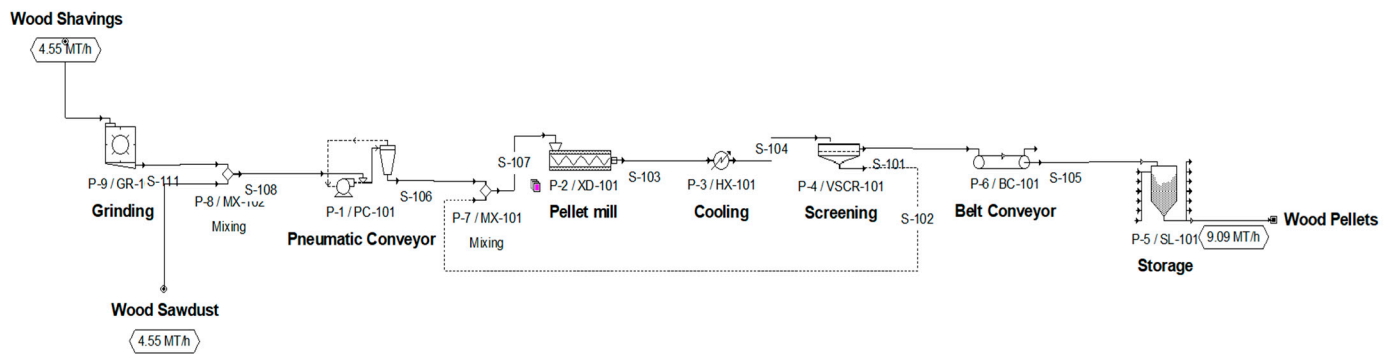

Figure S2. Process flow diagram for producing wood pellets from sawdust (scenario 2).

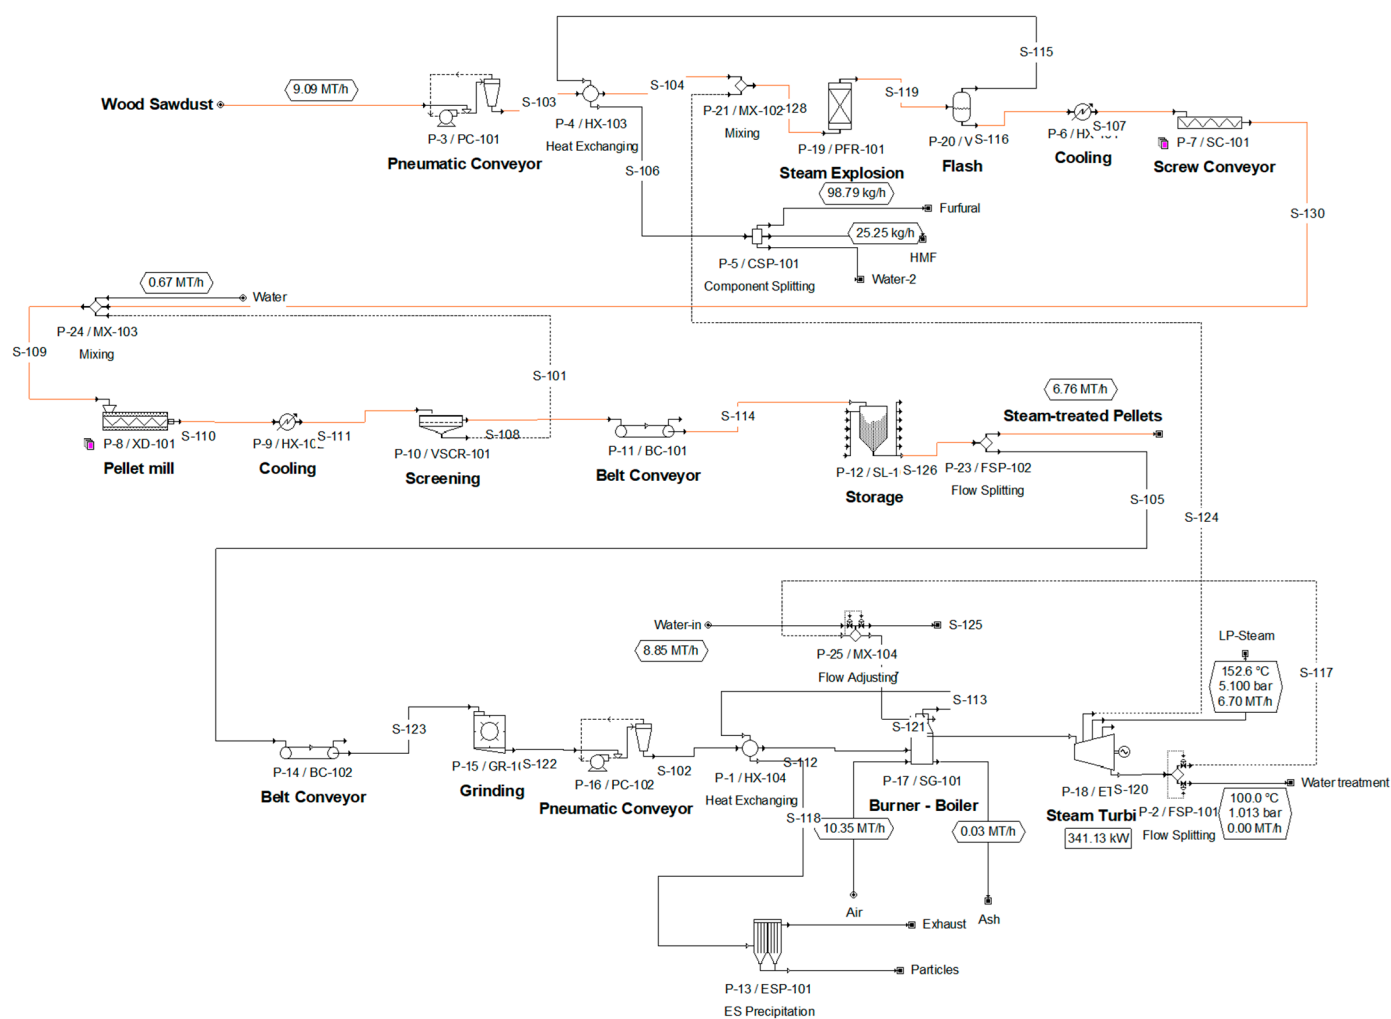

**Figure S3.** Process flow diagram for heat and electricity production from a portion (25%) of steam treated wood pellets (scenario 3).

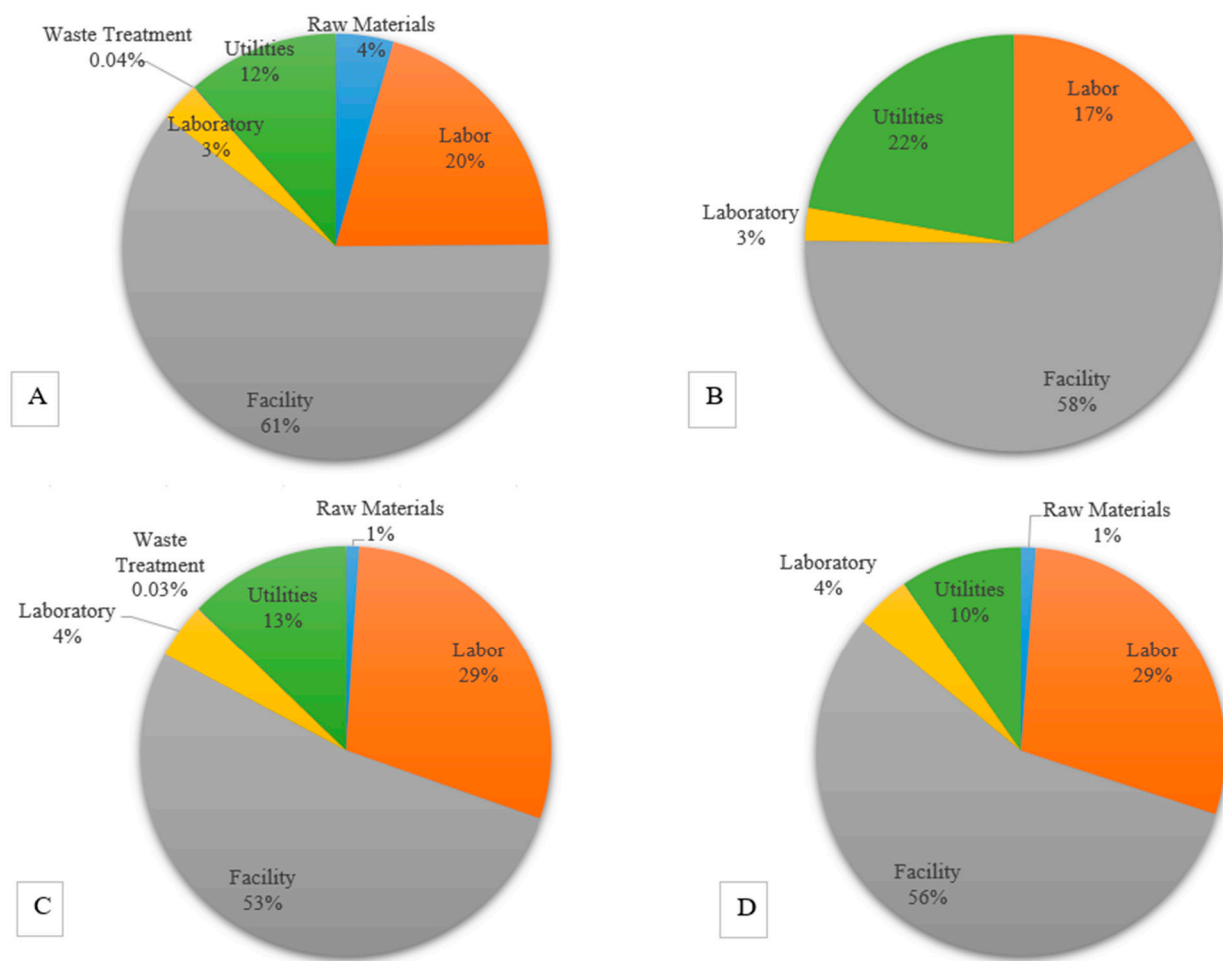

**Figure S4.** Contribution of each item to the annual operating cost (2020 prices (US\$)). Scenario 1: Direct CHP generation from wood sawdust and shavings (A); Scenario 2: Wood pellet production without CHP (B); Scenario 3: Production of pellets and CHP from steam-exploded wood (C); Scenario 4: Production of pellets and CHP from torrefied wood (D).
